# Supplementary material for: Lead (Pb) management in the entire life cycle of highly efficient and stable perovskite solar cells
Source: Royal Society of Chemistry journal article supplement (doi:10.1039/d4ee01829j), 2024-01-01
Supplement: d4ee01829j1.pdf [file d4ee01829j1.pdf]

## Supporting Information

### Lead (Pb) Management in the Entire Life Cycle of Highly Efficient and Stable Perovskite Solar Cells

Kai Liu<sup>a</sup>, Tianxiang Hu<sup>a</sup>, Zenghua Cai<sup>b</sup>, Fengcai Liu<sup>a</sup>, Saqib Rafique<sup>c</sup>, Xiaoguo Li<sup>a</sup>, Liangliang Deng<sup>a</sup>, Chongyuan Li<sup>a</sup>, Yanyan Wang<sup>a</sup>, Qiang Guo<sup>a</sup>, Xiaofei Yue<sup>a</sup>, Jiao Wang<sup>a</sup>, Yingguo Yang<sup>d</sup>, Chunxiao Cong<sup>a</sup>, Shiyu Chen<sup>e</sup>, Jia Zhang<sup>f</sup>, Anran Yu<sup>\*a</sup>, Yiqiang Zhan<sup>\*a,f</sup>

a. Center for Micro Nano Systems, School of Information Science and Technology (SIST), Fudan University, 200433 Shanghai, P. R. China

Email: [aryu@fudan.edu.cn](mailto:aryu@fudan.edu.cn); [yqzhan@fudan.edu.cn](mailto:yqzhan@fudan.edu.cn)

b. Jiangsu Key Laboratory of Micro and Nano Heat Fluid Flow Technology and Energy Application, School of Physical Science and Technology, Suzhou University of Science and Technology, Suzhou, 215009, China

c. Oxide and chalcogenide MOCVD Centre Room 220, CSIM Building, Swansea University, Bay Campus, Fabian Way, Crymlyn Burrows, Skewen, Swansea, SA18EN

d. School of Microelectronics, Fudan University, Shanghai, 200433, P. R. China

e. Key Laboratory of Computational Physical Sciences (MOE), and State Key Laboratory of ASIC and System, School of Microelectronics, Fudan University, Shanghai 200433, China

f. State Key Laboratory of Photovoltaic Science and Technology, Institute of Optoelectronics, Fudan University, Shanghai 200438, China

\* Corresponding author

Control perovskite films:

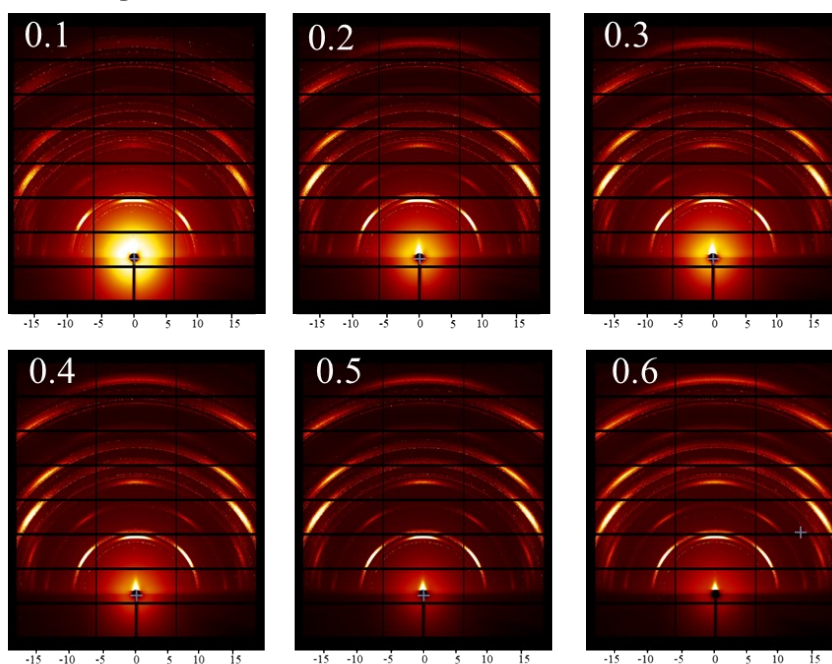

Target perovskite films:

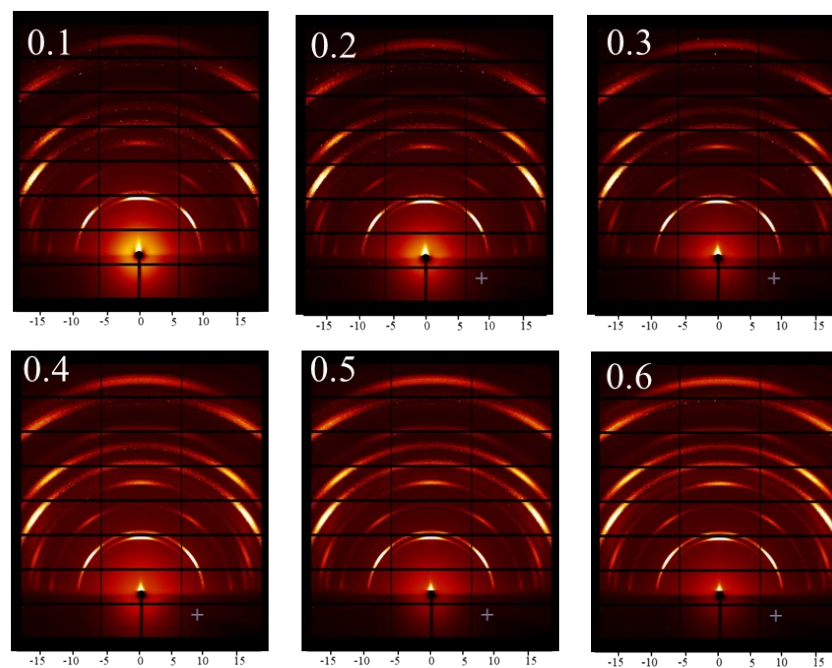

**Figure S1.** 2D-GIWAXS images of perovskite films at various incident angel ranging from  $0.1^\circ$  to  $0.6^\circ$ .

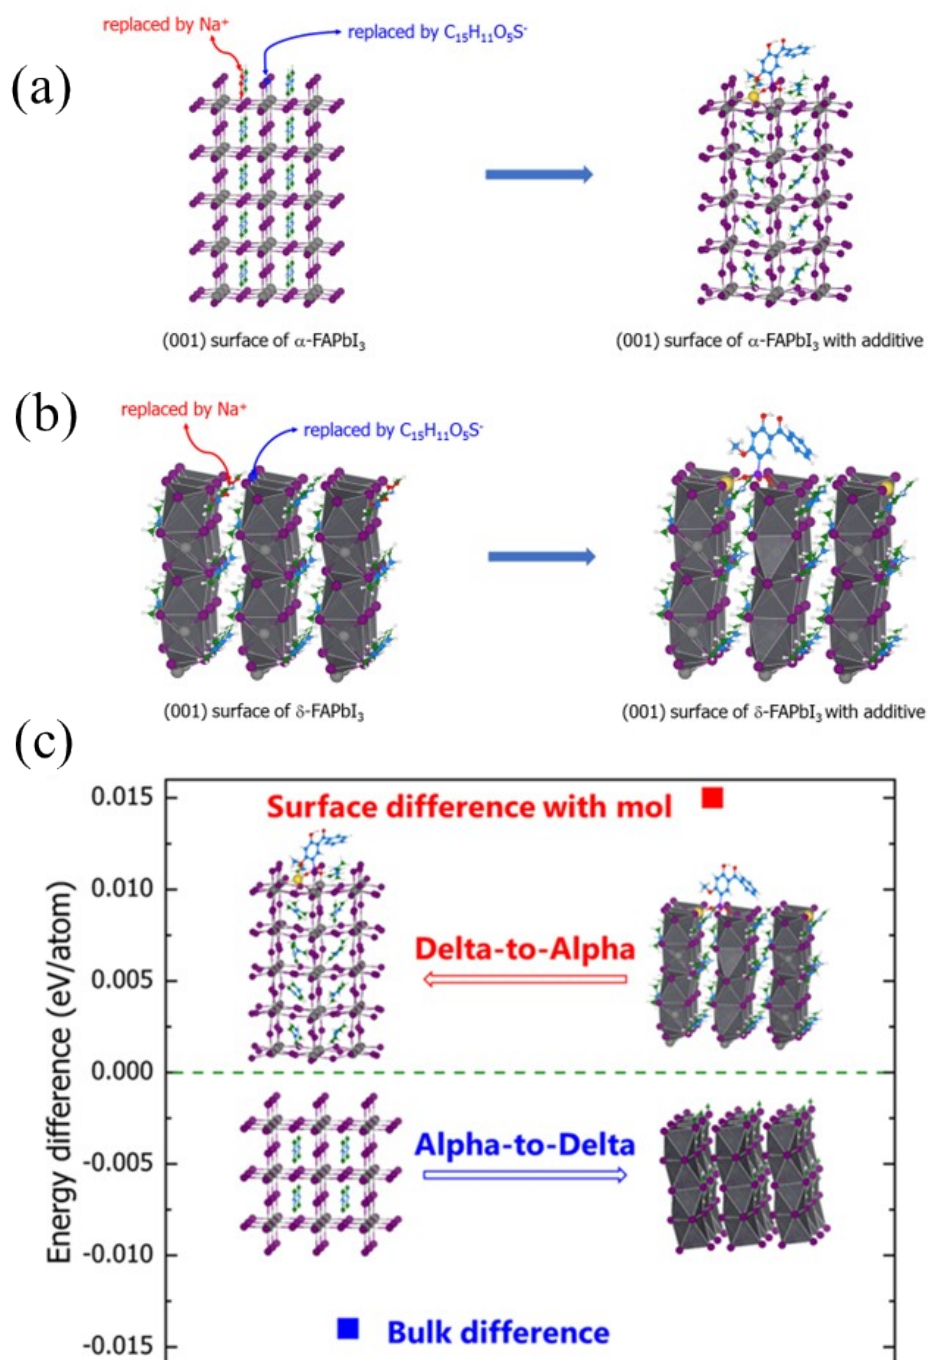

**Figure S2.** Theoretical simulation of FA perovskites with BP molecules. (a-b) The process of constructing the stable surface structure of FAPbI<sub>3</sub> with BP molecules. (c) DFT calculation results about the total energy difference w/wo BP-5 at the surface of FAPbI<sub>3</sub>.

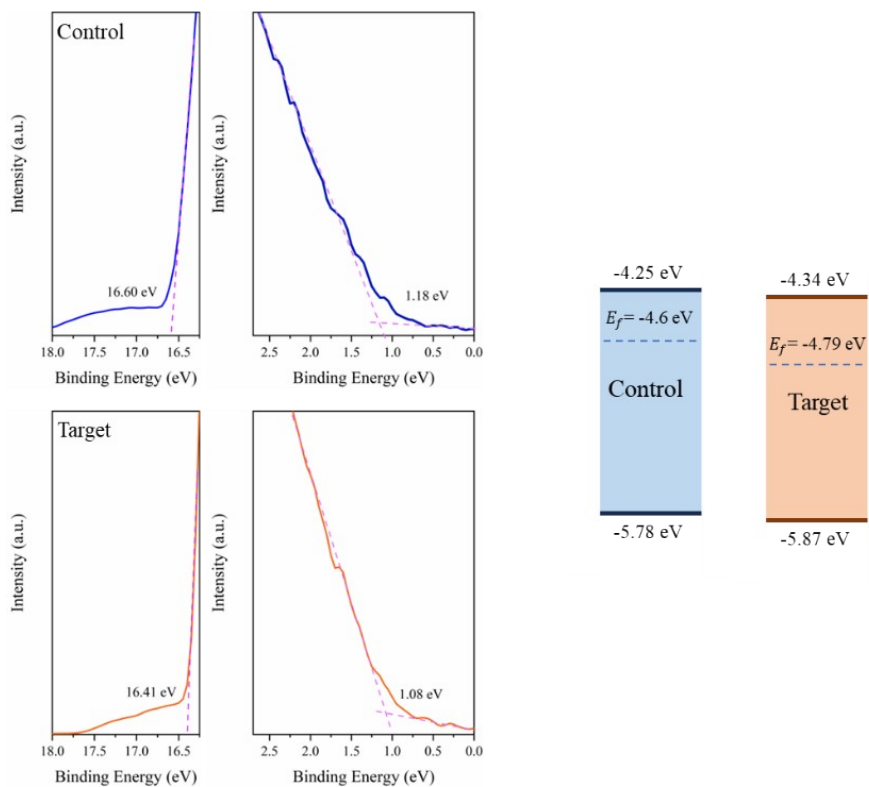

**Figure S3.** The UPS results and the energy band illustration of control and target perovskite films.

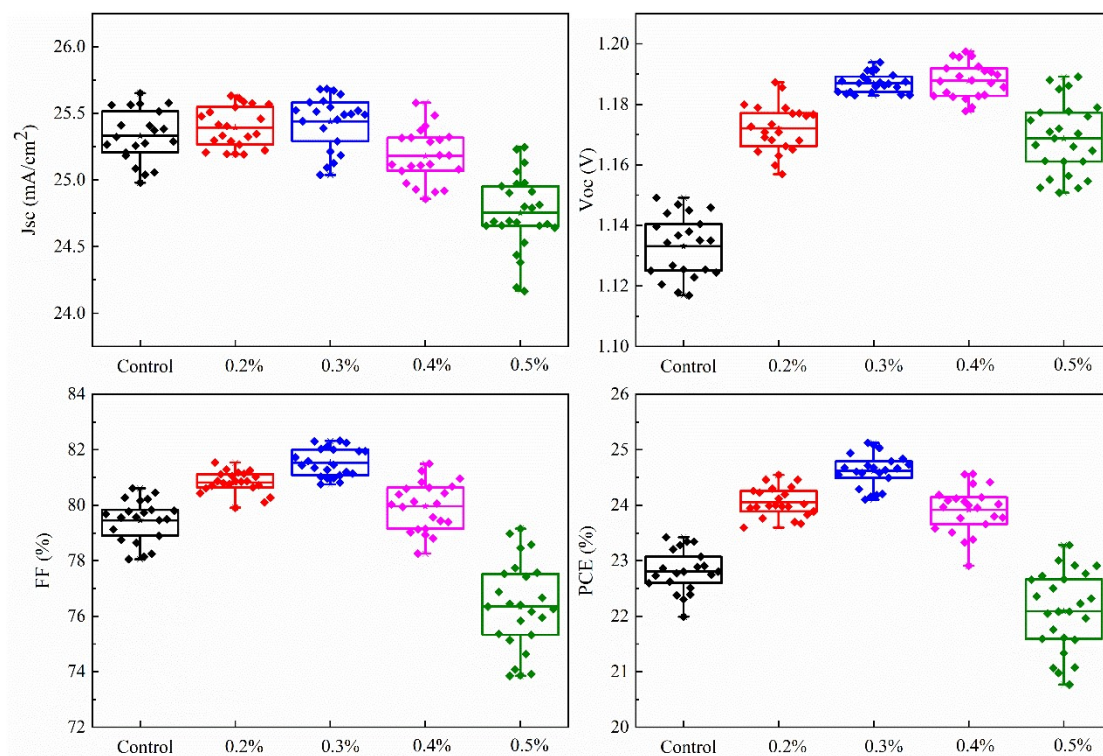

**Figure S4.** The photovoltaic parameters statistics of the control and target devices with different concentration of BP-5 molecules.

### Measurement Report

**Client Name** Fudan University  
**Client Address** Handan Rd.220, 200433, Shanghai, China  
**Sample** Perovskite solar cell  
**Manufacturer** FDU, Yiqiang Zhan Group  
**Application** SIMITL2022102801  
**Measurement Date** 28<sup>th</sup> October, 2022

**Performed by:** *Qiang Shi* Date: 28<sup>th</sup> October, 2022  
 Qiang Shi  
**Reviewed by:** *Wenjie Zhao* Date: 28<sup>th</sup> October, 2022  
 Wenjie Zhao  
**Approved by:** *Zhengxin Liu* Date: Nov. 10, 2022  
 Zhengxin Liu

The measurement report without signature and seal are not valid. This report shall not be reproduced, except in full, without the approval of SIMIT.

Report No.22TR102802

1/3

| Sample Information      |                         |
|-------------------------|-------------------------|
| Sample Type             | Perovskite solar cell   |
| Serial No.              | 0.6-1-4#                |
| Lab Internal No.        | 22102801-2#             |
| Measurement Item        | I-V characteristic      |
| Measurement Environment | 25.3±2.0°C, 40.5±5.0%RH |

| Measurement of I-V characteristic                        |                                                                                                                                                       |
|----------------------------------------------------------|-------------------------------------------------------------------------------------------------------------------------------------------------------|
| Reference cell                                           | AK-200                                                                                                                                                |
| Reference cell Type                                      | mono-Si, WPV5, calibrated by National Institute of Metrology, China (Certificate No. GXG2022-01035)                                                   |
| Calibration Value/Date of Calibration for Reference cell | 128.1mA/Apr. 2022                                                                                                                                     |
| Measurement Conditions                                   | STC, linear sweep based on IEC 60904-1:2006                                                                                                           |
| Measurement Equipment/ Date of Calibration               | Steady State Solar Simulator (YS-T155-1M) / July 2022<br>IV test system (ADCMT 6246) / June 2022<br>SR Measurement system (CEP-25ML-CAS) / April 2022 |
| Mismatch Factor                                          | SMM=0.9900                                                                                                                                            |

| Serial Number | Scan Mode  | Area <sup>ref</sup> (cm <sup>2</sup> ) | Isc (mA) | Voc (V) | Pmax (mW) | FF (%) | EFF (%) |
|---------------|------------|----------------------------------------|----------|---------|-----------|--------|---------|
| 0.6-1-4#      | Isc to Voc | 0.0638                                 | 1.602    | 1.165   | 1.492     | 79.98  | 23.39   |
|               | Voc to Isc | 0.0638                                 | 1.602    | 1.162   | 1.558     | 83.71  | 24.42   |

Supplementary information: \*{da}, Designated area defined by thin metal aperture mask.

Test results listed in this measurement report refer exclusively to the mentioned test sample. The results apply only at the time of the test, and do not imply future performance.

Report No.22TR102802

2/3

#### I-V Curve

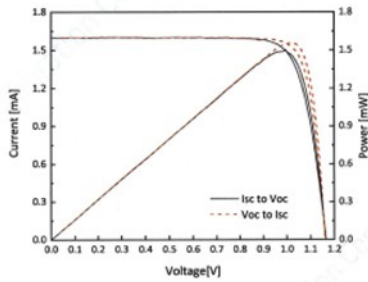

|                     |                                |                     |                                |
|---------------------|--------------------------------|---------------------|--------------------------------|
| Date:               | 28 <sup>th</sup> October, 2022 | Date:               | 28 <sup>th</sup> October, 2022 |
| Data No:            | IV_22102801-2#_D               | Data No:            | IV_22102801-2#_R               |
| Serial No:          | 0.6-1-4#                       | Serial No:          | 0.6-1-4#                       |
| Area <sup>ref</sup> | 0.0638 cm <sup>2</sup>         | Area <sup>ref</sup> | 0.0638 cm <sup>2</sup>         |
| Isc                 | 1.602 mA                       | Isc                 | 1.602 mA                       |
| Voc                 | 1.165 V                        | Voc                 | 1.162 V                        |
| Pmax                | 1.492 mW                       | Pmax                | 1.558 mW                       |
| Ipm                 | 1.519 mA                       | Ipm                 | 1.528 mA                       |
| Vpm                 | 0.982 V                        | Vpm                 | 1.020 V                        |
| FF                  | 79.98 %                        | FF                  | 83.71 %                        |
| Eff                 | 23.39 %                        | Eff                 | 24.42 %                        |
| Dirr.               | 100 mW/cm <sup>2</sup>         | Dirr.               | 100 mW/cm <sup>2</sup>         |
| Mirr.               | 100 mW/cm <sup>2</sup>         | Mirr.               | 100 mW/cm <sup>2</sup>         |
| Scan Mode           | Isc to Voc                     | Scan Mode           | Voc to Isc                     |

Ref. Device No. AK-200  
 Cal. Val. of Ref. 128.1mA at 100mW/cm<sup>2</sup>

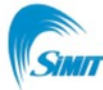

----- End of Report -----

Report No.22TR102802

3/3

Figure S5. The certified performance of the target device measured at SIMIT.

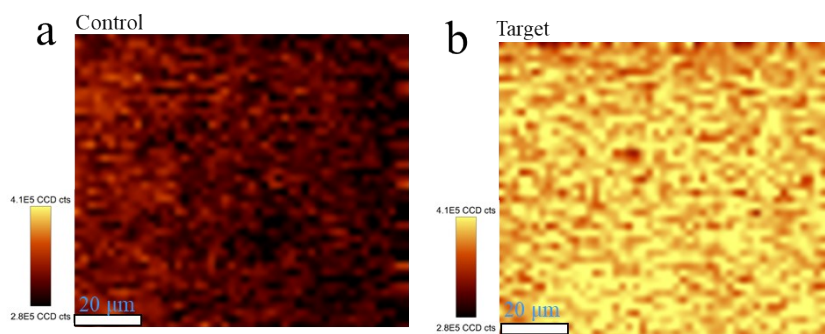

**Figure S6.** PL mapping images of control and target perovskite films.

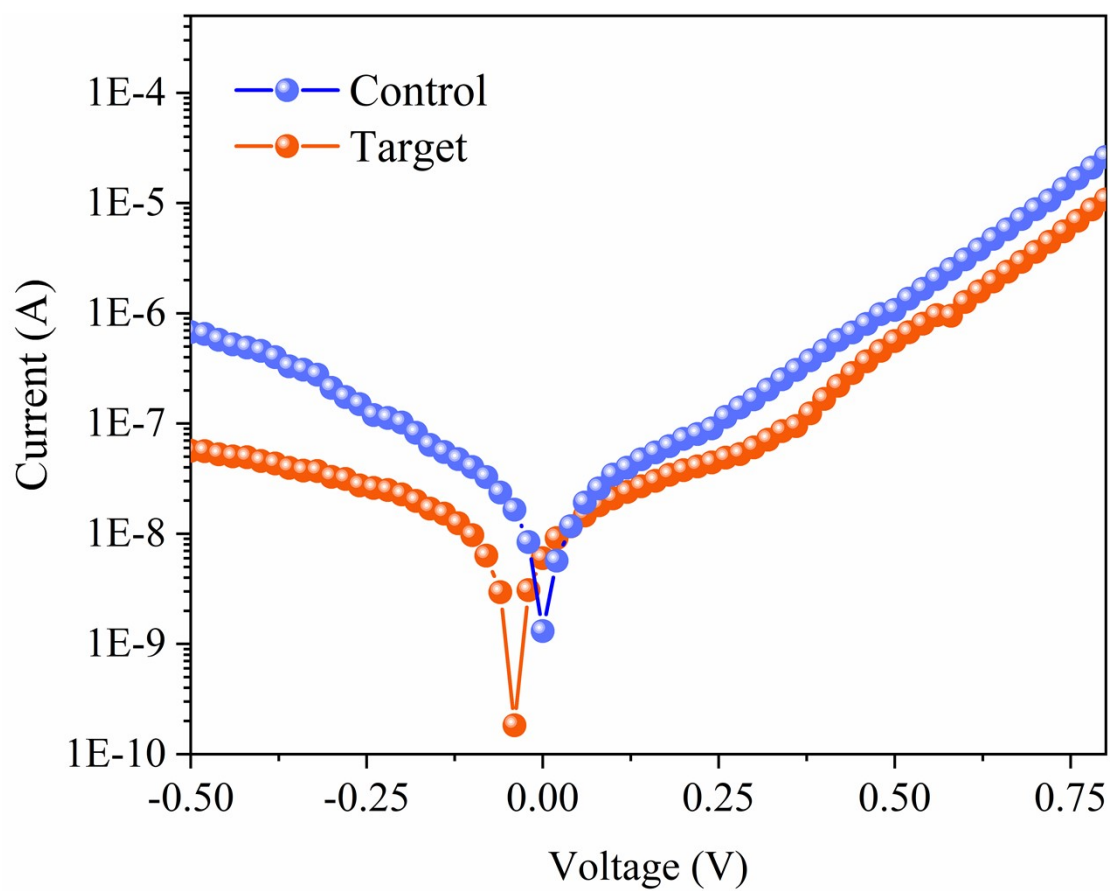

**Figure S7.** The dark current of the control and target device.



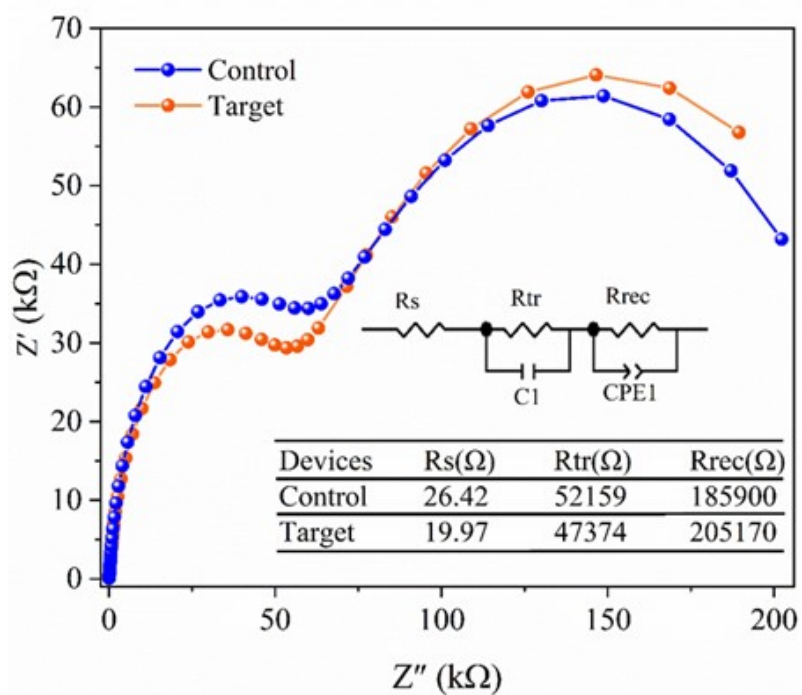

**Figure S8.** The EIS spectra of control and target devices. The fitted results are presented in the inset-table.

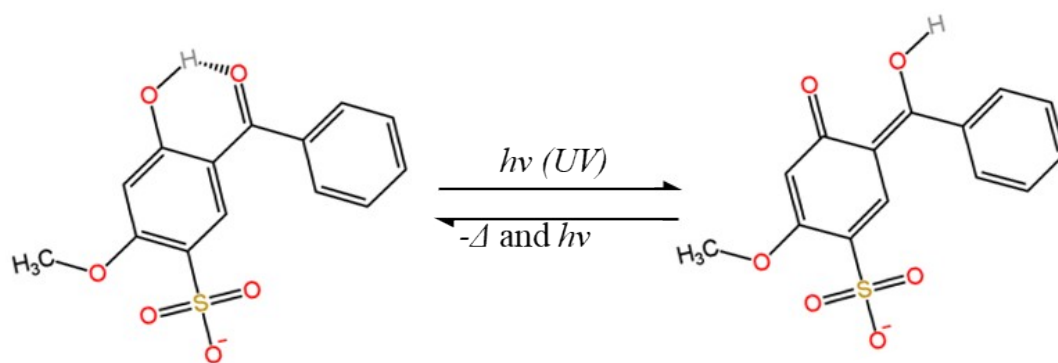

**Figure S9.** The mechanism of the UV absorption of BP-5 additives.

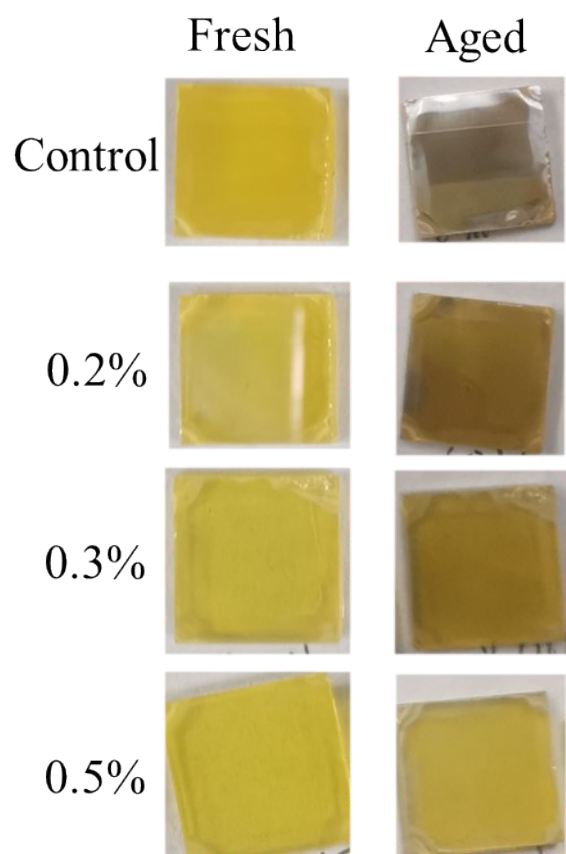

**Figure S10.** The digital photos of  $\text{PbI}_2$  films with different concentration of BP-5 additives before and after UV aging test.

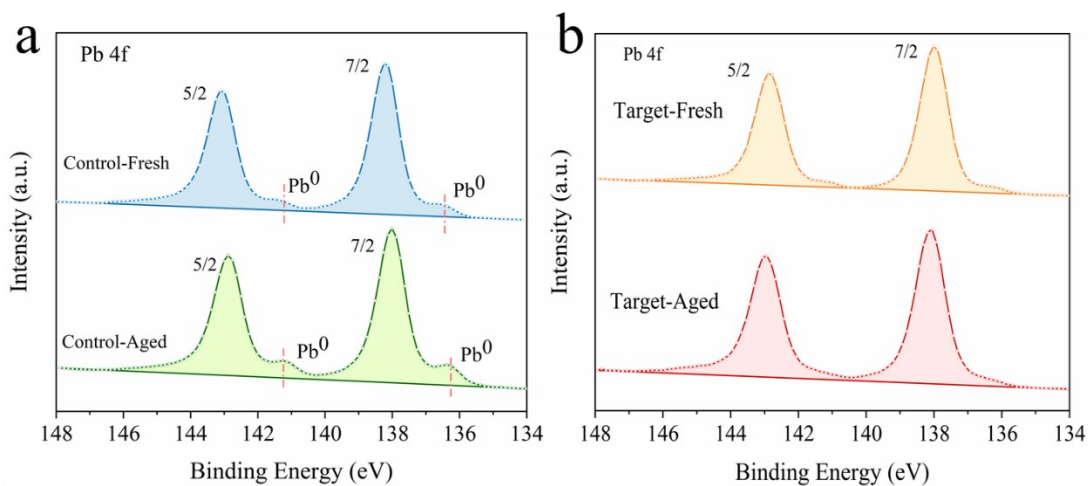

**Figure S11.** XPS analysis of control and target perovskite films. XPS spectra of control (a) and target films (b) before and after the UV aging period.

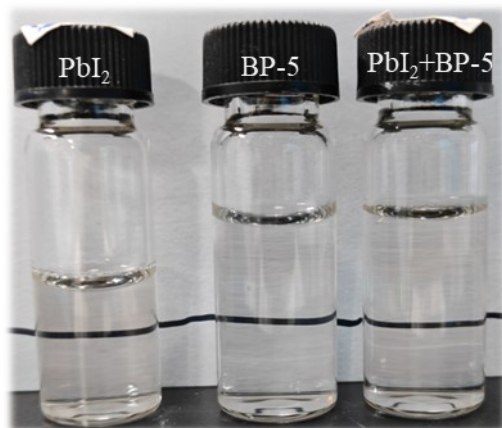

**Figure S12.** The pictures of different kinds of aqueous solutions. The clear black line indicates that there is no insoluble complex formed between BP-5 and lead iodide.

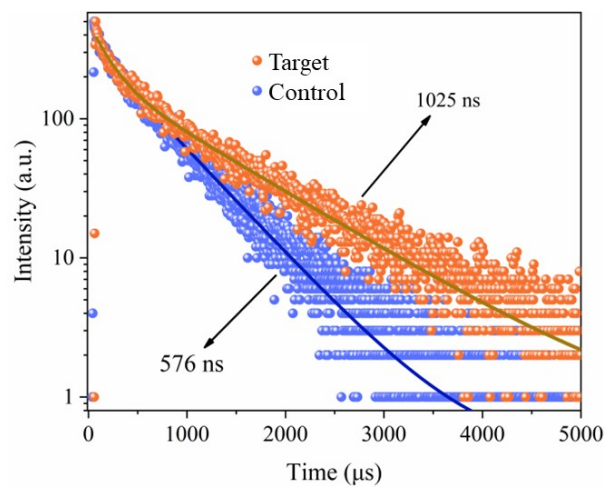

**Figure S13.** The TRPL results of control and target perovskite films (BP-9).

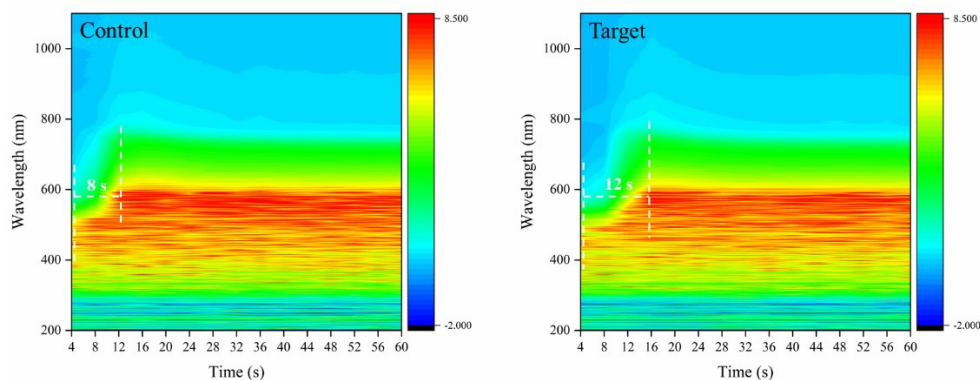

**Figure S14.** In-situ UV absorption spectra of control and target films during the initial annealing process at 150 °C

By using in-situ absorption spectra, we monitor the influence of BP-9 on crystallization process of perovskite. Figure S14 illustrates that the absorption edge of the control film shifts from 500 nm to 790 nm during the annealing process lasting from 4 s to 12 s, marking the transition from the intermediate phase to the perovskite phase. In contrast, the absorption edge of the target film extends to approximately 790 nm after 16 s of annealing, indicating a slower crystallization process in the target film. Moreover, the in-situ absorption spectra also revealed that after annealing for 16 s the control and target films both exhibit similar absorbance. This result suggests that the addition of BP additives cannot completely prevent the crystallization of perovskite, although it does slow down it through interaction.

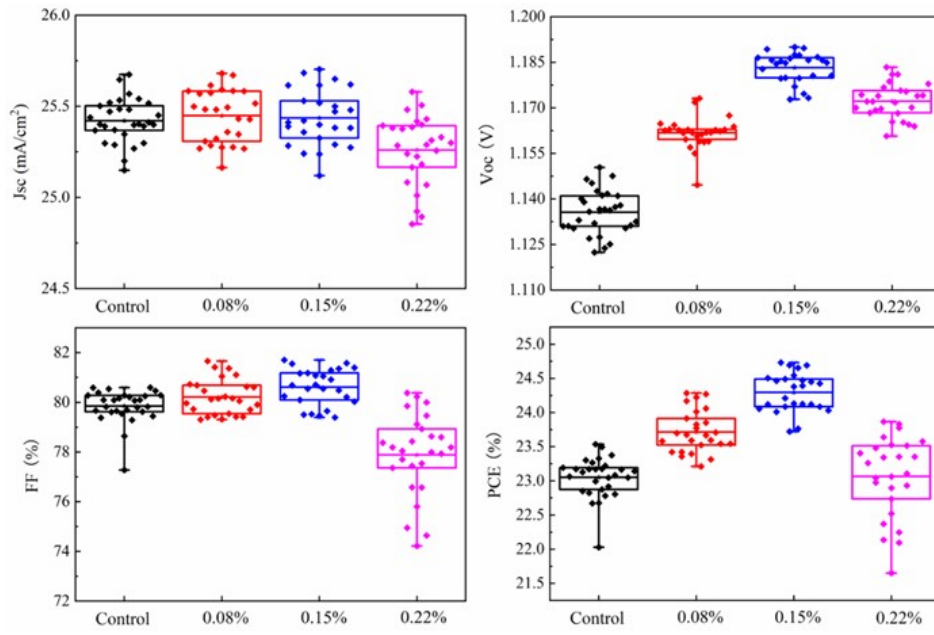

**Figure S15.** The photovoltaic parameters statistics of the control and target devices with different concentration of BP-9 molecules.



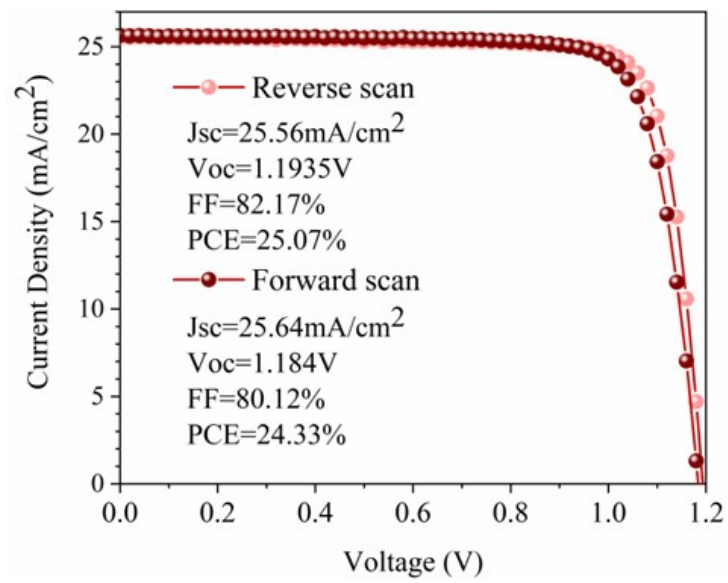

**Figure S16.** The efficiency of target devices (incorporated additives: BP-5 & BP-9). The device incorporated mixed additives (BP-5 &BP-9) shows similar efficiency in comparison to that of the champion device (incorporated additives: BP-5, Figure 3c)

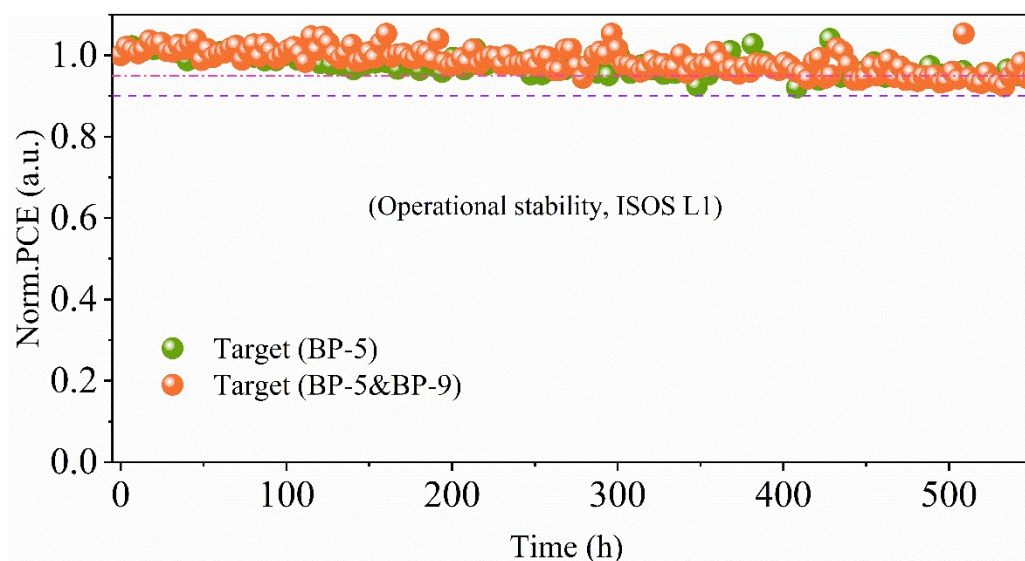

**Figure S17.** The operational stability of target devices. As shown in Figure S13, the target devices incorporated mixed additives (BP-5 and BP-9) also exhibits excellent operational stability.

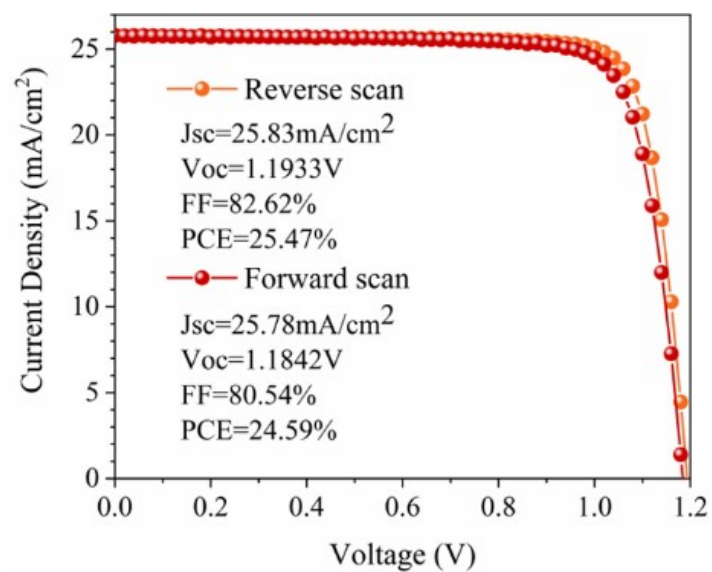

**Figure S18.** The efficiency of the latest n-i-p type PSCs fabricated by our strategy (BP-5 and BP-9)

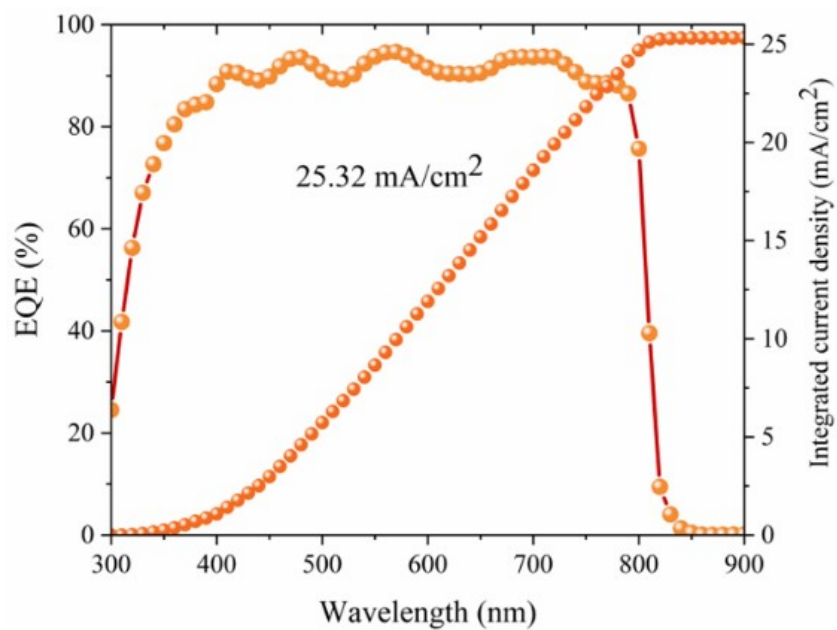

**Figure S19.** The EQE curve and the integrated  $J_{sc}$  of the target device.

| Device                | Scan Direction | Efficiency | Voc     | FF     | Jsc                      | Hysteresis Index |
|-----------------------|----------------|------------|---------|--------|--------------------------|------------------|
| <b>Control Device</b> | Reverse scan   | 23.43%     | 1.1492V | 79.70% | 25.58 mA/cm <sup>2</sup> | 7.73%            |
|                       | Forward scan   | 21.62%     | 1.1258V | 75.62% | 25.40 mA/cm <sup>2</sup> |                  |
| <b>Target Device</b>  | Reverse scan   | 25.13%     | 1.1913V | 82.25% | 25.64 mA/cm <sup>2</sup> | 2.51%            |
|                       | Forward scan   | 24.50%     | 1.1832V | 80.60% | 25.69 mA/cm <sup>2</sup> |                  |

**Table S1.** The photovoltaic parameters of champion control and target devices.

**Table S2.** The efficiency of devices made by different additives (control, BP-5, BP-9, BP-5&BP-9).

| Condition                                       | PCE    | FF     | Voc      | Jsc                      |
|-------------------------------------------------|--------|--------|----------|--------------------------|
| Control                                         | 23.43% | 79.70% | 1.1492V  | 25.58 mA/cm <sup>2</sup> |
| BP-9                                            | 24.73% | 81.36% | 1.1865V  | 25.62 mA/cm <sup>2</sup> |
| BP-5                                            | 25.13% | 82.25% | 1.1913V  | 25.64 mA/cm <sup>2</sup> |
| BP-5&BP-9<br>(0.25%: 0.12%)                     | 25.07% | 82.17% | 1.1935V  | 25.56 mA/cm <sup>2</sup> |
| BP-5&BP-9<br>(0.25%: 0.12%,<br>Champion device) | 25.47% | 82.62% | 1.1933V  | 25.83 mA/cm <sup>2</sup> |
| BP-5&BP-9<br>(0.25%: 0.15%)                     | 24.82% | 81.42% | 1.1951V  | 25.51 mA/cm <sup>2</sup> |
| BP-5&BP-9<br>(0.25%: 0.18%)                     | 24.05% | 79.12% | 1.1915 V | 25.51 mA/cm <sup>2</sup> |

**Table S3.** Photovoltaic performance (PCE and UV stability) of our devices compared with PSCs which were reported in the last two years.

| Perovskite                                             | PCE (%) | UV Stability (Time/retained initial efficiency) | Ref                                      |
|--------------------------------------------------------|---------|-------------------------------------------------|------------------------------------------|
| FA <sub>x</sub> MA <sub>1-x</sub> PbI <sub>3</sub>     | 24.08%  | 300h/83% (UV: 365nm, 60 mW/cm <sup>2</sup> )    | <i>Adv. Mater.</i> <sup>1</sup>          |
| FA <sub>x</sub> MA <sub>1-x</sub> PbI <sub>3</sub>     | 24.26%  | 60h/100% (UV: 405nm, I)                         | <i>Energy Environ. Sci.</i> <sup>2</sup> |
| FA <sub>x</sub> MA <sub>1-x</sub> PbI <sub>3</sub>     | 24.50%  | 1200h/87% (UV: 254nm, 50 mW/cm <sup>2</sup> )   | <i>Joule</i> <sup>3</sup>                |
| FA <sub>x</sub> MA <sub>1-x</sub> PbI <sub>3</sub>     | 24.58%  | 170h/86% (UV: 365nm, 60 mW/cm <sup>2</sup> )    | <i>Adv. Energy Mater.</i> <sup>4</sup>   |
| CsFAMA                                                 | 22.40%  | 70h/91% (UV: 365nm, 50 mW/cm <sup>2</sup> )     | <i>Nano Energy</i> <sup>5</sup>          |
| FA <sub>x</sub> MA <sub>1-x</sub> PbI <sub>3</sub>     | 24.50%  | 47h/90% (UV: 365nm, 119 mW/cm <sup>2</sup> )    | <i>Adv. Funct. Mater.</i> <sup>6</sup>   |
| FACsPb(I <sub>x</sub> Br <sub>1-x</sub> ) <sub>3</sub> | 21.54%  | 60h/85% (UV: 365nm, 60 mW/cm <sup>2</sup> )     | <i>Small Methods</i> <sup>7</sup>        |
| CsFAMA                                                 | 22.14%  | 72h/70% (UV: 275nm, 10 mW/cm <sup>2</sup> )     | <i>J. Mater. Chem.</i> <sup>8</sup>      |
| FA <sub>x</sub> MA <sub>1-x</sub> PbI <sub>3</sub>     | 25.47%  | 620h/96% (UV: 365nm, 22 mW/cm <sup>2</sup> )    | <b>This work</b>                         |

## References

1. W. Sheng, J. He, J. Yang, Q. Cai, S. Xiao, Y. Zhong, L. Tan and Y. Chen, *Adv. Mater.*, 2023, **35**, e2301852.
2. Y. Gao, F. Ren, D. Sun, S. Li, G. Zheng, J. Wang, H. Raza, R. Chen, H. Wang, S. Liu, P. Yu, X. Meng, J. He, J. Zhou, X. Hu, Z. Zhang, L. Qiu, W. Chen and Z. Liu, *Energy Environ. Sci.*, 2023, **16**, 2295-2303.
3. H. Huang, P. Cui, Y. Chen, L. Yan, X. Yue, S. Qu, X. Wang, S. Du, B. Liu, Q. Zhang, Z. Lan, Y. Yang, J. Ji, X. Zhao, Y. Li, X. Wang, X. Ding and M. Li, *Joule*, 2022, **6**, 2186-2202.
4. Y. Li, L. Liu, C. Zheng, Z. Liu, L. Chen, N. Yuan, J. Ding, D. Wang and S. Liu, *Adv. Energy Mater.*, 2023, **13**, 2203190.
5. X. Zhu, C. F. J. Lau, K. Mo, S. Cheng, Y. Xu, R. Li, C. Wang, Q. Zheng, Y. Liu, T. Wang, Q. Lin and Z. Wang, *Nano Energy*, 2022, **103**, 107849.
6. L. Deng, H. Wang, S. Rafique, Y. Wang, T. Hu, K. Liu, Y. Wang, X. Li, Z. Xie, J. Tang, Z. Liu, J. Li, W. Yuan, J. Wang, A. Yu and Y. Zhan, *Adv. Funct. Mater.*, 2023, **33**, 2303742.
7. Y. Dai, X. Ge, B. Shi, P. Wang, Y. Zhao and X. Zhang, *Small Methods*, 2024, DOI: 10.1002/smt.202301793, e2301793.
8. J. Zhu, X. Hu, Z. Liu, M. Guo, Y. Zhang, Y. Li, J. Li and M. Wei, *J. Mater. Chem. A*, 2023, **11**, 14959-14970.
